# Supplementary material for: Effect of steady-state aerobic exercise intensity and duration on the relationship between reserves of heart rate and oxygen uptake
Source: PeerJ. 2022 Apr 25;10:e13190. doi: 10.7717/peerj.13190 (PMC9048681; doi:10.7717/peerj.13190)
Supplement: Supplemental Information 1 — HRR, heart rate reserve; V̇O2R, oxygen uptake reserve; SSE, steady-state exercise. [file peerj-10-13190-s001.xlsx]

## Sheet: Sheet1
HRR_15min_60HRR	VO2R_15min_60HRR	HRR_45min_60HRR	VO2R_45min_60HRR	HRR_15min_80HRR	VO2R_15min_80HRR	HRR_45min_80HRR	VO2R_45min_80HRR
58.8819	55.0933	62.3275	47.1479	81.584	85.1524	81.9605	68.8368
62.7307	59.8712	64.3573	59.8888	85.455	78.5938	82.0399	79.9452
59.084	65.1482	64.9372	68.6559	83.2192	81.3852	84.2353	78.7211
60.9943	60.8889	60.898	54.113	81.342	86.5464	79.4782	71.1212
63.3914	63.4859	62.7745	59.553	81.3122	78.8059	77.6404	62.9652
66.9461	73.7128	63.8674	68.3053	83.8222	90.9069	83.4982	80.7541
62.6316	54.257	62.8293	49.8956	83.2836	72.2026	82.9009	70.7847
59.2364	54.3644	65.2348	61.1321	80.8271	83.5981	79.2285	68.8343
